# Supplementary material
Source: HighWire-hosted journal article supplement (https://erj.ersjournals.com/content/49/3/1600791)
Supplement: inline-supplementary-material-2 [file inline-supplementary-material-2.pdf]

**Evidence Profile #1**

**Comparison: Oral corticosteroids vs. no corticosteroids for ambulatory COPD exacerbations**

**Bibliography:** **16)** Aaron SD, Vandemheen KL, Hebert P, et al. Outpatient oral prednisone after emergency treatment of chronic obstructive pulmonary disease. *New Engl J Med* 2003; 348:2618-2625; **17)** Thompson W, Nielson C, Carvalho P, et al. Controlled Trial of Oral Prednisone in Outpatients with Acute COPD Exacerbation. *Am J Respir Crit Care Med* 1996; 154:407-412; **18)** Bathorn E, Liesker JJ, Postma DS, et al. Anti-inflammatory effects of combined budesonide/formoterol in COPD exacerbations. *COPD J Chronic Obstructive Pulm Dis* 2008; 5:282-290.

| Quality assessment                                                                                                                                                            |                   |                          |                      |                      |                      |                      | No of patients       |               | Effect                         |                                                 | Quality          | Importance |
|-------------------------------------------------------------------------------------------------------------------------------------------------------------------------------|-------------------|--------------------------|----------------------|----------------------|----------------------|----------------------|----------------------|---------------|--------------------------------|-------------------------------------------------|------------------|------------|
| No of studies                                                                                                                                                                 | Design            | Risk of bias             | Inconsistency        | Indirectness         | Imprecision          | Other considerations | Oral corticosteroids | Placebo       | Relative (95% CI)              | Absolute                                        |                  |            |
| <b>Treatment failure (an unscheduled visit to the physician, a return to the ER because of worsening of dyspnea, hospitalisation, or dyspnea requiring open label CS) (%)</b> |                   |                          |                      |                      |                      |                      |                      |               |                                |                                                 |                  |            |
| 3                                                                                                                                                                             | randomised trials | not serious <sup>1</sup> | serious <sup>2</sup> | serious <sup>3</sup> | serious <sup>4</sup> | none                 | 26/98 (26.5%)        | 42/99 (42.4%) | <b>RR 0.69</b> (0.22 to 2.19)  | 132 fewer per 1000 (from 331 fewer to 505 more) | ⊕○○○<br>VERY LOW | CRITICAL   |
| <b>Hospital admission (%)</b>                                                                                                                                                 |                   |                          |                      |                      |                      |                      |                      |               |                                |                                                 |                  |            |
| 3                                                                                                                                                                             | randomised trials | not serious <sup>1</sup> | not serious          | serious <sup>3</sup> | serious <sup>4</sup> | none                 | 8/101 (7.9%)         | 17/100 (17%)  | <b>RR 0.49</b> (0.23 to 1.06)  | 87 fewer per 1000 (from 131 fewer to 10 more)   | ⊕⊕○○<br>LOW      | CRITICAL   |
| <b>Mortality (%)</b>                                                                                                                                                          |                   |                          |                      |                      |                      |                      |                      |               |                                |                                                 |                  |            |
| 2                                                                                                                                                                             | randomised trials | not serious              | not serious          | serious <sup>5</sup> | serious <sup>4</sup> | none                 | 1/87 (1.1%)          | 1/87 (1.1%)   | <b>RR 0.99</b> (0.06 to 15.48) | 0 fewer per 1000 (from 11 fewer to 166 more)    | ⊕⊕○○<br>LOW      | CRITICAL   |
| <b>Time to next exacerbation (days)</b>                                                                                                                                       |                   |                          |                      |                      |                      |                      |                      |               |                                |                                                 |                  |            |
| NR <sup>5</sup>                                                                                                                                                               | -                 | -                        | -                    | -                    | -                    | -                    | -                    | -             | -                              | -                                               | -                | CRITICAL   |
| <b>Change in quality of life (CRQ) (Better indicated by higher values)</b>                                                                                                    |                   |                          |                      |                      |                      |                      |                      |               |                                |                                                 |                  |            |

|                                   |                   |             |             |                      |                      |      |                |                |                                |                                                   |             |           |
|-----------------------------------|-------------------|-------------|-------------|----------------------|----------------------|------|----------------|----------------|--------------------------------|---------------------------------------------------|-------------|-----------|
| 1                                 | randomised trials | not serious | not serious | serious <sup>6</sup> | serious <sup>4</sup> | none | 74             | 64             | -                              | <b>MD 0.38 higher</b> (0.09 lower to 0.85 higher) | ⊕⊕○○<br>LOW | IMPORTANT |
| <b>Serious adverse events (%)</b> |                   |             |             |                      |                      |      |                |                |                                |                                                   |             |           |
| 2                                 | randomised trials | not serious | not serious | serious <sup>5</sup> | serious <sup>4</sup> | none | 2/89<br>(2.2%) | 1/88<br>(1.1%) | <b>RR 1.97</b> (0.18 to 21.29) | 11 more per 1000 (from 9 fewer to 231 more)       | ⊕⊕○○<br>LOW | IMPORTANT |

Abbreviations: CI= confidence interval; ER= emergency room; CS= corticosteroids; RR= relative risk; COPD= chronic obstructive pulmonary disease; CRQ= chronic respiratory disease questionnaire; FEV1= forced expiratory volume in one second; MD= mean difference; NR= not reported.

<sup>1</sup> In one of the trials (Thompson, et al), the steroid group had more patients taking an inhaled corticosteroid than the placebo group; however, the task force did not deem the imbalance serious enough to warrant downgrading the quality of evidence.

<sup>2</sup> In two trials, the estimated effect favored steroids (Aaron, et al. and Thompson, et al.), whereas in one trial the estimated effect favored placebo (Bathorn, et al).

<sup>3</sup> One of the trials enrolled patients who presented to the emergency department (Aaron, et al.) and, in another trial, more than half of patients were enrolled in the emergency department (Thompson, et al.), suggesting that many of the patients had a more severe exacerbation than those for whom the question is intended.

<sup>4</sup> The ends of the confidence interval lead to opposite clinical actions.

<sup>5</sup> The larger of the trials enrolled patients who presented to the emergency department (Aaron, et al.), suggesting that many of the patients studied had a more severe exacerbation than those for whom the question is intended.

<sup>6</sup> The trial enrolled patients who presented to the emergency department (Aaron, et al.), suggesting that many of the patients studied had a more severe exacerbation than those for whom the question is intended.



| Length of hospital stay (days) |   |   |   |   |   |   |   |   |   |   |   |          |
|--------------------------------|---|---|---|---|---|---|---|---|---|---|---|----------|
| NR                             | - | - | - | - | - | - | - | - | - | - | - | CRITICAL |
| Hospital admission (%)         |   |   |   |   |   |   |   |   |   |   |   |          |
| NR                             | - | - | - | - | - | - | - | - | - | - | - | CRITICAL |

Abbreviations: CI= confidence intervals; RR= relative risk; MD= mean difference; MeD= median difference.

<sup>1</sup> Wide confidence intervals; the ends of the confidence interval would lead to different clinical decisions

<sup>2</sup> Patient level data was not reported; therefore, the difference in the medians with 95% CI could not be calculated via a Wilcoxon-Mann-Whitney test.

### Evidence Profile #3

#### Comparison: Intravenous corticosteroids vs. oral corticosteroids for COPD exacerbations

**Bibliography: 34)** de Jong YP, Uil SM, Grotjohan HP, Postma DS, Kerstjens HA, and van den Berg JW. Oral or IV prednisolone in the treatment of COPD exacerbations: a randomized, controlled, double-blind study. *Chest* 2007; 132(6): 1741-1747; **35)** Ceviker Y, Sayiner A, et al. Comparisons of two systemic steroid regimens for the treatment of COPD exacerbations. *Pulm Rehab Ther* 2014; 27, 179-183.

| Quality assessment                                                                                                                                                                  |                   |                      |               |              |                      |                      | No of patients |                | Effect                         |                                              | Quality         | Importance |
|-------------------------------------------------------------------------------------------------------------------------------------------------------------------------------------|-------------------|----------------------|---------------|--------------|----------------------|----------------------|----------------|----------------|--------------------------------|----------------------------------------------|-----------------|------------|
| No of studies                                                                                                                                                                       | Study design      | Risk of bias         | Inconsistency | Indirectness | Imprecision          | Other considerations | IV CS          | Oral CS        | Relative (95% CI)              | Absolute (95% CI)                            |                 |            |
| <b>Treatment failure (follow up at 90 days; defined as death, admission to the ICU, readmission to the ICU because of COPD, or intensification of pharmacological therapy ) (%)</b> |                   |                      |               |              |                      |                      |                |                |                                |                                              |                 |            |
| 2                                                                                                                                                                                   | randomised trials | serious <sup>1</sup> | not serious   | not serious  | serious <sup>2</sup> | none                 | 68/127 (53.5%) | 60/121 (49.6%) | <b>RR 1.09</b> (0.87 to 1.37)  | 45 more per 1000 (from 64 fewer to 183 more) | ⊕⊕○<br>○<br>LOW | CRITICAL   |
| <b>Mortality (%)</b>                                                                                                                                                                |                   |                      |               |              |                      |                      |                |                |                                |                                              |                 |            |
| 2                                                                                                                                                                                   | randomised trials | serious <sup>1</sup> | not serious   | not serious  | serious <sup>2</sup> | none                 | 7/127 (5.5%)   | 2/121 (1.7%)   | <b>RR 2.78</b> (0.67 to 11.51) | 29 more per 1000 (from 5 fewer to 174 more)  | ⊕⊕○<br>○<br>LOW | CRITICAL   |
| <b>Readmission to hospital (%)</b>                                                                                                                                                  |                   |                      |               |              |                      |                      |                |                |                                |                                              |                 |            |
| 2                                                                                                                                                                                   | randomised trials | serious <sup>1</sup> | not serious   | not serious  | serious <sup>2</sup> | none                 | 18/127 (14.2%) | 15/121 (12.4%) | <b>RR 1.13</b> (0.60 to 2.13)  | 16 more per 1000 (from 50 fewer to 140 more) | ⊕⊕○<br>○<br>LOW | CRITICAL   |
| <b>Length of hospital stay (days)</b>                                                                                                                                               |                   |                      |               |              |                      |                      |                |                |                                |                                              |                 |            |

| Quality assessment                      |                   |                      |               |              |                      |                      | № of patients  |            | Effect                       |                                                       | Quality         | Importance |
|-----------------------------------------|-------------------|----------------------|---------------|--------------|----------------------|----------------------|----------------|------------|------------------------------|-------------------------------------------------------|-----------------|------------|
| № of studies                            | Study design      | Risk of bias         | Inconsistency | Indirectness | Imprecision          | Other considerations | IV CS          | Oral CS    | Relative (95% CI)            | Absolute (95% CI)                                     |                 |            |
| 2                                       | randomised trials | serious <sup>1</sup> | not serious   | not serious  | serious <sup>2</sup> | none                 | 127            | 121        | -                            | <b>MD 0.71 days more</b><br>(1.35 fewer to 2.78 more) | ⊕⊕○<br>○<br>LOW | CRITICAL   |
| <b>Time to next exacerbation (days)</b> |                   |                      |               |              |                      |                      |                |            |                              |                                                       |                 |            |
| NR                                      | -                 | -                    | -             | -            | -                    | -                    | -              | -          | -                            | -                                                     | -               | CRITICAL   |
| <b>Adverse events (%)</b>               |                   |                      |               |              |                      |                      |                |            |                              |                                                       |                 |            |
| 1                                       | randomised trials | serious <sup>1</sup> | not serious   | not serious  | serious <sup>2</sup> | none                 | 14/20<br>(70%) | 4/20 (20%) | <b>RR 3.50</b><br>(1.39-8.8) | 500 more per 1000 (from<br>192 more to 695 more)      | ⊕⊕○<br>○<br>LOW | IMPORTANT  |

Abbreviations: CS= corticosteroids; CI= confidence intervals; RR= relative risk; ICU= intensive care unit; COPD= chronic obstructive pulmonary disease; FEV1= forced expiratory volume in one second; SGRQ= St. George's Respiratory Questionnaire; MD= mean difference; NR= not reported.

<sup>1</sup> One of the trials (Ceviker, et al.) did not blind the patients or clinicians, thereby allowing the possibility of bias due to co-interventions.

<sup>2</sup> Wide confidence intervals; the ends of the confidence interval would lead to different clinical decisions

<sup>3</sup> Higher SGRQ scores normally indicate more physical limitations; however, the authors reported improvement in some domains.

#### Evidence Profile #4

##### Comparison: Usual care plus non-invasive mechanical ventilation vs. usual care alone for COPD exacerbations.

**Bibliography:** **39)** Andeev S, Tretyakov A, Grigoryants R, Kutsenko M, Chuchalin A. Noninvasive positive airway pressure ventilation: role in treating acute respiratory failure caused by chronic obstructive pulmonary disease. *Anesteziologita Reanimatologia* 1998;3:45-51. **40)** Barbe R, Togores B, Rubi M, Pons S, Maimo A, Agusti A. Noninvasive ventilatory support does not facilitate recovery from acute respiratory failure caused by chronic obstructive pulmonary disease. *Eur Respir J* 1996;9:1240-5. **41)** Bott J, Carroll M, Conway J, Keilty S, Ward E, Brown A et al. Randomised controlled trial of nasal ventilation in acute ventilatory failure due to chronic obstructive airways disease. *Lancet* 1993;341(8860):1555-7. **42)** Brochard L, Mancebo J, Wysocki M, Lofaso F, Conti G, Rauss A et al. Noninvasive ventilation for acute exacerbations of chronic obstructive pulmonary disease. *New Engl J Med* 1995;333(13):817-22. **43)** Celikel T, Sungur M, Ceyhan B, Karakurt S. Comparison of noninvasive positive pressure ventilation with standard medical therapy in hypercapnic acute respiratory failure. *Chest* 1998;114:1636-42. **44)** Conti G, Antonelli M, Navalesi P, Rocco M, Bui M, Spadetta G et al. Non-invasive vs conventional mechanical ventilation in patients with chronic obstructive pulmonary disease after failure of medical treatment in the ward: a randomised trial. *Intensive Care Medicine* 2002;28(12):1701-7. **45)** del Castillo D, Barrot E, Laserna E, Otero R, Cayuela A, Castillo Gomez J. Noninvasive positive pressure ventilation for acute respiratory failure in chronic obstructive pulmonary disease in a general respiratory ward. *Medicina Clinica (Barc)* 2003;120(17):647-51. **46)** Dikensoy O, Ikidag B, Filiz A, Bayram N. Comparison of noninvasive ventilation and standard medical therapy in acute hypercapnic respiratory failure: a randomised controlled trial at a tertiary health centre in SE Turkey. *Int J Clinical Pract* 2002;56(2):85-8. **47)** Khilnani GC, Saikia N, Banga A, Sharma SK. Non-invasive ventilation for acute exacerbation of COPD with very high PaCO<sub>2</sub>: A randomized controlled trial. *Lung India* 2010 July;27(3):125-30. **48)** Kramer N, Meyer T, Meharg J, Cece R, Hill N. Randomised prospective trial of noninvasive positive pressure ventilation in acute respiratory failure. *Am J Resp Crit Care Med* 1995;151(6):1799-806. **49)** Plant P, Owen J, Elliott M. Early use of noninvasive ventilation for acute exacerbations of chronic obstructive pulmonary disease on general respiratory wards: a multicenter, randomised, controlled trial. *Lancet* 2000;355(9219):1931-5. **50)** Servillo G, Ughi L, Rossano F, Leone D. Noninvasive mask pressure support ventilation in COPD patients. *Intensive Care Medicine* 1994;20:S54. **51)** Thys F, Roeseler J, Reynaert M, Liistro G, Rodenstein D. Noninvasive ventilation for acute respiratory failure: a prospective randomised placebo-controlled trial. *Eur Respir J* 2002;20(3):545-55. **52)** Zhou R, Chen P, Luo H, Xiang X. Effects of noninvasive positive pressure ventilation on gas exchange and patients' transformation on chronic obstructive pulmonary disease and respiratory failure. *Bulletin of Human Medical University* 2001;26(3):261-2. **53)** Carrera M, Marin JM, Anton A, Chiner E, Alonso ML, Masa JF, Marrades R, Sala E, Carrizo S, Giner J, et al. A controlled trial of noninvasive ventilation for chronic obstructive pulmonary disease exacerbations. *Journal of Critical Care* 2009; 24(3):473-14; **54)** Keenan SP, Powers CE, and McCormack DG. Noninvasive positive-pressure ventilation in patients with milder chronic obstructive pulmonary disease exacerbations: a randomized controlled trial. *Respiratory Care* 2005; 50(5):610-616. **55)** Pastaka C, Kostikas K, Karetsi E, Tsolaki V, Antoniadou I, and Gourgoulialis KI. Non-invasive ventilation in chronic hypercapnic COPD patients with exacerbation and a pH of 7.35 or higher. *European Journal of Internal Medicine* 2007; 18(7):524-530; **56)** Schmidbauer W, Ahlers O, Spies C, Dreyer A, Mager G, and Kerner T. Early prehospital use of non-invasive ventilation improves acute respiratory failure in acute exacerbation of chronic obstructive pulmonary disease. *Emergency Medicine Journal* 2011; 28(7):626-627. **57)** Vargas F, Bui HN, Boyer A, Salmi LR, Gbikpi-Benissan G, Guenard H, Gruson D, and Hilbert G. Intrapulmonary percussive ventilation in acute exacerbations of COPD patients with mild respiratory acidosis: a randomized controlled trial. *Critical Care* 2005; 9(4):R382-R389. **58)** Wang C. Collaborative Research Group of Noninvasive Mechanical Ventilation for Chronic Obstructive Pulmonary Disease. Early use of non-invasive positive pressure ventilation for acute exacerbations of chronic obstructive pulmonary disease: A multicentre randomized controlled trial. *Chinese Med J* 2005; 118(24):2034-2040; **59)** Dhamija A, Tyagi P, Caroli R, Rahman M, Vijayan VK. Non-invasive ventilation in mild to moderate cases of respiratory failure due to acute exacerbations of chronic obstructive pulmonary disease. *Saudi Med J* 2005; 26(5):887-890.

| Quality assessment   |              |              |               |              |             |                      | No of patients |            | Effect            |                   | Quality | Importance |
|----------------------|--------------|--------------|---------------|--------------|-------------|----------------------|----------------|------------|-------------------|-------------------|---------|------------|
| No of studies        | Study design | Risk of bias | Inconsistency | Indirectness | Imprecision | Other considerations | NIV            | Usual Care | Relative (95% CI) | Absolute (95% CI) |         |            |
| <b>Mortality (%)</b> |              |              |               |              |             |                      |                |            |                   |                   |         |            |

| Quality assessment                    |                   |                      |                      |              |                      |                      | № of patients  |                 | Effect                           |                                                                      | Quality          | Importance |
|---------------------------------------|-------------------|----------------------|----------------------|--------------|----------------------|----------------------|----------------|-----------------|----------------------------------|----------------------------------------------------------------------|------------------|------------|
| № of studies                          | Study design      | Risk of bias         | Inconsistency        | Indirectness | Imprecision          | Other considerations | NIV            | Usual Care      | Relative (95% CI)                | Absolute (95% CI)                                                    |                  |            |
| 17                                    | randomised trials | serious <sup>1</sup> | not serious          | not serious  | not serious          | none                 | 41/575 (7.1%)  | 81/581 (13.9%)  | <b>RR 0.54</b><br>(0.38 to 0.76) | 50 fewer per 1000 (from 20 fewer to 80 fewer)                        | ⊕⊕⊕○<br>MODERATE | CRITICAL   |
| <b>Intubation rate (%)</b>            |                   |                      |                      |              |                      |                      |                |                 |                                  |                                                                      |                  |            |
| 21                                    | randomised trials | serious <sup>2</sup> | not serious          | not serious  | not serious          | none                 | 80/664 (12.0%) | 205/670 (30.6%) | <b>RR 0.43</b><br>(0.35 to 0.53) | 190 fewer per 1000 (from 120 fewer to 270 fewer)                     | ⊕⊕⊕○<br>MODERATE | CRITICAL   |
| <b>Length of hospital stay (days)</b> |                   |                      |                      |              |                      |                      |                |                 |                                  |                                                                      |                  |            |
| 15                                    | randomised trials | serious <sup>3</sup> | serious <sup>4</sup> | not serious  | not serious          | none                 | 577            | 582             | -                                | <b>MD 2.88 days fewer</b><br>(4.59 fewer to 1.17 fewer) <sup>5</sup> | ⊕⊕○○<br>LOW      | CRITICAL   |
| <b>Length of ICU stay (days)</b>      |                   |                      |                      |              |                      |                      |                |                 |                                  |                                                                      |                  |            |
| 3                                     | randomised trials | serious <sup>6</sup> | not serious          | not serious  | serious <sup>7</sup> | none                 | 35             | 26              | -                                | <b>MD 4.99 fewer</b><br>(9.99 fewer to 0 )                           | ⊕⊕○○<br>LOW      | CRITICAL   |
| <b>Complications of treatment (%)</b> |                   |                      |                      |              |                      |                      |                |                 |                                  |                                                                      |                  |            |



| Quality assessment                   |                   |                      |                       |              |                      |                      | № of patients  |                | Effect                           |                                                      | Quality          | Importance |
|--------------------------------------|-------------------|----------------------|-----------------------|--------------|----------------------|----------------------|----------------|----------------|----------------------------------|------------------------------------------------------|------------------|------------|
| № of studies                         | Study design      | Risk of bias         | Inconsistency         | Indirectness | Imprecision          | Other considerations | NIV            | Usual Care     | Relative (95% CI)                | Absolute (95% CI)                                    |                  |            |
| 5                                    | randomised trials | serious <sup>8</sup> | not serious           | not serious  | not serious          | none                 | 22/140 (15.7%) | 60/143 (42.0%) | <b>RR 0.39</b><br>(0.26 to 0.59) | 256 fewer per 1000 (from 172 fewer to 310 fewer)     | ⊕⊕⊕⊕<br>HIGH     | IMPORTANT  |
| <b>pH one hour post-intervention</b> |                   |                      |                       |              |                      |                      |                |                |                                  |                                                      |                  |            |
| 13                                   | randomised trials | serious <sup>9</sup> | serious <sup>10</sup> | not serious  | serious <sup>7</sup> | none                 | 521            | 522            | -                                | <b>MD 0.02 higher</b><br>(0.01 lower to 0.06 higher) | ⊕○○○<br>VERY LOW | IMPORTANT  |
| <b>Nosocomial pneumonia (%)</b>      |                   |                      |                       |              |                      |                      |                |                |                                  |                                                      |                  |            |
| NR                                   | -                 | -                    | -                     | -            | -                    | -                    | -              | -              | -                                | -                                                    | -                | CRITICAL   |

Abbreviations: NIV= non-invasive mechanical ventilation; CI= confidence intervals; RR= relative risk; MD= mean difference; ICU= intensive care unit.

<sup>1</sup> 7 out of 17 trials had unclear allocation concealment; none of the 17 trials was blinded.

<sup>2</sup> 9 out of 21 trials had unclear concealment of allocation; only one out of 21 trials was blinded.

<sup>3</sup> 5 out of 15 trials had unclear allocation concealment; only one of the 15 trials was blinded.

<sup>4</sup> There was significant heterogeneity,  $I^2=82\%$ . In addition, one patient in Keenan et al. was an outlier; however sensitivity analysis excluding the outlier did not significantly change the result or the heterogeneity level.

<sup>5</sup> The values reported for Carrera et al. were assumed to be mean and standard deviation.

<sup>6</sup> 1 out of 3 trials had unclear concealment of allocation; 2 out of 3 studies were not blinded.

<sup>7</sup> Wide confidence intervals; the ends of the confidence interval would lead to different clinical decisions.

<sup>8</sup> 1 out of 5 studies had unclear concealment of allocation; none of the studies were blinded.

<sup>9</sup> 5 out of 13 studies had unclear concealment of allocation; none of the studies were blinded.

<sup>10</sup> There was significant heterogeneity,  $I^2=93\%$ .

**Evidence Profile #5**

**Comparison: Hospital-at-home vs. hospital admission for acute exacerbations of COPD.**

**Bibliography:** **65)** Cotton MM, Bucknall CE, Dagg KD, Johnson MK, MacGregor G, Stewart C, and Stevenson RD. Early discharge for patients with exacerbations of chronic obstructive pulmonary disease: a randomised controlled trial. *Thorax* 2000; 55(11):902-906; **66)** Davies L, Wilkinso, M, Bonner S, Calverley PM and Angus RM. "Hospital at home" versus hospital care in patients with exacerbations of chronic obstructive pulmonary disease: a prospective randomised controlled trial. *BMJ* 2000; 321(7271):1265-1268; **67)** Hernandez C, Casas A, Escarrabill J, Alonso J, Puig-Junoy J, Farrero E, Vilagut G, Collivent B, Rodriguez-Roisin R, Roca J, et al. Home hospitalisation of exacerbated chronic obstructive pulmonary disease patients. *Eur Respir J* 2003; 21(1):58-67; **68)** Nicholson C, Bowler S, Jackson C, Schollay D, Tweeddale M, and O'Rourke P. Cost comparison of hospital and home based treatment models for acute chronic obstructive pulmonary disease. *Australia Health Review* 2001; 24(4):181-187; **69)** Nissen I and Jensen MS. Nurse supported discharge of patients with exacerbation of chronic obstructive pulmonary disease. *Ugeskrift for læger* 2007; 169:2220-2223; **70)** Ojoo JC, Moon T, McGlone S, Martin K, Gardiner ED, Greenstone MA, and Morice AH. Patients' and carers' preferences in two models of care for acute exacerbations of COPD. *Thorax* 2002; 57(2):167-169; **71)** Ricuada NA, Tibaldi V, Leff B, Scarafioti C, Marinello R, Zanolchi M, and Molaschi M. Substitutive "hospital at home" versus inpatient care for elderly patients with exacerbations of chronic obstructive pulmonary disease: a prospective, randomised, controlled trial. *J Am Geriatrics Soc* 2008; 56(493):500. **72)** Skwarska E, Cohen G, Skwarski KM, Lamb C, Bushell D, Parker S, and MacNee W. Randomised controlled trial of supported discharge in patients with exacerbations of chronic obstructive pulmonary disease. *Thorax* 2000; 55(11):907-912. **73)** Utens C, Goossens L, Smeenk F, Rutten-van Mölken M, van Vliet M, Braken M, van Eijsden LM, van Schayck OC. Early assisted discharge with generic community nursing for chronic obstructive pulmonary disease exacerbations: results of a randomised controlled trial. *BMJ Open* 2012; 2:e001684.

| Quality assessment                                                                             |                   |              |                          |              |                      |                      | No of patients   |                    | Effect                        |                                               | Quality       | Importance |
|------------------------------------------------------------------------------------------------|-------------------|--------------|--------------------------|--------------|----------------------|----------------------|------------------|--------------------|-------------------------------|-----------------------------------------------|---------------|------------|
| No of studies                                                                                  | Design            | Risk of bias | Inconsistency            | Indirectness | Imprecision          | Other considerations | Hospital at home | Hospital admission | Relative (95% CI)             | Absolute                                      |               |            |
| <b>Hospital readmission (%)</b>                                                                |                   |              |                          |              |                      |                      |                  |                    |                               |                                               |               |            |
| <b>All trials</b>                                                                              |                   |              |                          |              |                      |                      |                  |                    |                               |                                               |               |            |
| 9 <sup>1</sup>                                                                                 | randomised trials | not serious  | not serious <sup>2</sup> | not serious  | serious <sup>3</sup> | none                 | 153/571 (26.8%)  | 150/438 (34.2%)    | <b>RR 0.78</b> (0.62 to 0.99) | 80 fewer per 1000 (from 0 fewer to 130 fewer) | ⊕⊕⊕○ MODERATE | CRITICAL   |
| <b>Trials that discharged patients from the emergency department to a hospital-at-home</b>     |                   |              |                          |              |                      |                      |                  |                    |                               |                                               |               |            |
| 5 <sup>4</sup>                                                                                 | randomised trials | not serious  | serious <sup>5</sup>     | not serious  | serious <sup>3</sup> | none                 | 93/316 (29.4%)   | 92/245 (37.6%)     | <b>RR 0.81</b> (0.54 to 1.20) | 71 fewer per 1000 (from 173 fewer to 75 more) | —             | —          |
| <b>Trials that discharged patients to a hospital-at-home following a brief hospitalization</b> |                   |              |                          |              |                      |                      |                  |                    |                               |                                               |               |            |

|                                                                                                |                   |             |             |             |                      |      |                |                |                               |                                               |               |           |
|------------------------------------------------------------------------------------------------|-------------------|-------------|-------------|-------------|----------------------|------|----------------|----------------|-------------------------------|-----------------------------------------------|---------------|-----------|
| 3 <sup>6</sup>                                                                                 | randomised trials | not serious | not serious | not serious | serious <sup>3</sup> | none | 56/233 (24.0%) | 50/171 (29.2%) | <b>RR 0.82</b> (0.59 to 1.13) | 53 fewer per 1000 (from 120 fewer to 38 more) | —             | —         |
| <b>Mortality (%)</b>                                                                           |                   |             |             |             |                      |      |                |                |                               |                                               |               |           |
| <b>All trials</b>                                                                              |                   |             |             |             |                      |      |                |                |                               |                                               |               |           |
| 3 <sup>7</sup>                                                                                 | randomised trials | not serious | not serious | not serious | serious <sup>3</sup> | none | 31/558 (5.6%)  | 36/426 (8.5%)  | <b>RR 0.66</b> (0.41 to 1.05) | 30 fewer per 1000 (from 50 fewer to 5 more)   | ⊕⊕⊕○ MODERATE | CRITICAL  |
| <b>Trials that discharged patients from the emergency department to a hospital-at-home</b>     |                   |             |             |             |                      |      |                |                |                               |                                               |               |           |
| 4 <sup>8</sup>                                                                                 | randomised trials | not serious | not serious | not serious | serious <sup>3</sup> | none | 24/303 (7.9%)  | 26/233 (11.1%) | <b>RR 0.74</b> (0.43 to 1.27) | 29 fewer per 1000 (from 64 fewer to 30 more)  | —             | —         |
| <b>Trials that discharged patients to a hospital-at-home following a brief hospitalization</b> |                   |             |             |             |                      |      |                |                |                               |                                               |               |           |
| 3 <sup>6</sup>                                                                                 | randomised trials | not serious | not serious | not serious | serious <sup>3</sup> | none | 6/233 (2.6%)   | 10/171 (5.8%)  | <b>RR 0.37</b> (0.14 to 1.00) | 37 fewer per 1000 (from 50 fewer to 0 fewer)  | —             | —         |
| <b>Time to first readmission (days)</b>                                                        |                   |             |             |             |                      |      |                |                |                               |                                               |               |           |
| 1                                                                                              | randomised trials | not serious | not serious | not serious | serious <sup>3</sup> | none | 70             | 69             | -                             | <b>MD 8 higher</b> (3.7 lower to 19.7 higher) | ⊕⊕⊕○ MODERATE | CRITICAL  |
| <b>Hospital acquired infections (%)</b>                                                        |                   |             |             |             |                      |      |                |                |                               |                                               |               |           |
| NR                                                                                             | -                 | -           | -           | -           | -                    | -    | -              | -              | -                             | -                                             | -             | IMPORTANT |
| <b>Quality of Life (SGRQ) (Better indicated by lower values)</b>                               |                   |             |             |             |                      |      |                |                |                               |                                               |               |           |

|                 |   |   |   |   |   |   |   |   |   |   |   |   |           |
|-----------------|---|---|---|---|---|---|---|---|---|---|---|---|-----------|
| NR <sup>9</sup> | - | - | - | - | - | - | - | - | - | - | - | – | IMPORTANT |
|-----------------|---|---|---|---|---|---|---|---|---|---|---|---|-----------|

Abbreviations: CI= confidence intervals; RR= relative risk; FEV1= forced expiratory volume in one second; MD= mean difference; SMD= standard mean difference; QoL= quality of life; SGRQ= St. George's Respiratory Questionnaire; NR= not reported.

<sup>1</sup> Davies 2000; Hernandez 2003; Ojoo 2002; Ricauda 2008; Nicholson 2001; Cotton 2000; Skwarska 2000; Nissen 2007; and, Utens 2012.

<sup>2</sup> Some heterogeneity was detected,  $I^2=30\%$ ; however, the panel elected to not downgrade the quality of evidence because it was judged too mild to reduce their confidence in the estimated effects.

<sup>3</sup> Wide confidence intervals; the ends of the confidence interval would lead to different clinical decisions.

<sup>4</sup> Davies 2000; Hernandez 2003; Nicholson 2001; Ojoo 2002; and, Ricauda 2008.

<sup>5</sup> Inconsistency:  $I^2=56\%$ .  $P(\text{het})=0.06$ .

<sup>6</sup> Cotton 2000; Skwarska 2000; and, Utens 2012.

<sup>7</sup> Davies 2000; Hernandez 2003; Ojoo 2002; Ricauda 2008; Cotton 2000; Skwarska 2000; Nissen 2007; and, Utens 2012.

<sup>8</sup> Davies 2000; Hernandez 2003; Ojoo 2002; and, Ricauda 2008.

<sup>9</sup> Not reported in a useful manner. Among the three trials that reported the outcome, one did not provide standard deviations, another only provided SGRQ scores for a subgroup of the participants, and the third measured generic HRQoL using the EuroQoL-5D. The analyses were not considered by the panel.

**Evidence Profile #6**

**Comparison: Early pulmonary rehabilitation vs. usual care (i.e., late pulmonary rehabilitation or no pulmonary rehabilitation) for COPD exacerbations**

**Bibliography:** **77)** Behnke M, Taube C, Kirsten D, Lehnigk B, Jurras RA, and Magussen H. Home-based exercise is capable of preserving hospital-based improvements in severe chronic obstructive pulmonary disease. *Respir Med* 2000; 94(12):1184-1191. **79)** Eaton T, Young P, Fergusson W, Moodie L, Zeng I, O’Kane F, Good N, Rhodes L, Poole P, and Kolbe J Does early pulmonary rehabilitation reduce acute health-care utilization in COPD patients admitted with an exacerbation? A randomized controlled study. *Respirology* 2009; 14(2):230-238. **80)** Kirsten DK, Taube C, Lehnigk B, Arres RA, and Magnussen H. Exercise training improves recovery in patients with COPD after an acute exacerbation. *Respir Med* 1998;92(10):1191-1198. **81)** Man WD, Polkey MI Donaldson N, Gray BM, and Moxham, J. Community pulmonary rehabilitation after hospitalisation for acute exacerbations of chronic obstructive pulmonary disease: randomised controlled study. *BMJ* 2004; 329:1209. **82)** Murphy N, Bell C, and Costello RW. Extending a home from hospital care programme for COPD exacerbations to include pulmonary rehabilitation. *Respiratory Medicine* 2005; 99(10):1297-1302. **83)** Nava S. Rehabilitation of patients admitted to a respiratory intensive care unit. *Arch Phys Med Rehab* 1998; 79(7):849-854. **84)** Seymour JM, Moore L, Jolley CJ, Ward K, Creasey J, Steier JS, Yung B, Man WD, Hart N, Polkey PI, and Moxham J. Outpatient pulmonary rehabilitation following acute exacerbations of COPD. *Thorax* 2010; 65(5):423-428. **85)** Troosters T, Probst VS, Crul T, Pitta F, Gayan-Ramirez G, Decramer M, and Gosselink R. Resistance training prevents deterioration in quadriceps muscle function during acute exacerbations of chronic obstructive pulmonary disease. *Am J Respir Crit Care Med* 2010; 181(10):1072-1077. **86)** Ghanem M, Elaal EA, Mehany M, and Tolba K. Home-based pulmonary rehabilitation program: Effect on exercise tolerance and quality of life in chronic obstructive pulmonary disease patients. *Ann Thorac Med* 2010; 5(1):18-25. **87)** Ko FW, Dai DL, Ngai J, Tung A, Ng S, Lai K, Fong R, Lau H, Tam W, and Hui DS. Effect of early pulmonary rehabilitation on health care utilization and health status in patients hospitalized with acute exacerbations of COPD. *Respirology* 2011; 16(4):617-624. **88)** Deepak TH, Mohapatra PR, Janmeja AK, Sood P, and Gupta M. Outcome of pulmonary rehabilitation in patients after acute exacerbation of COPD. *Indian J Chest Dis Allied Sci* 2014; 56:7-12. **89)** Tang CY, Blackstock FC, Clarence M, Taylor NF. Early rehabilitation exercise program for inpatients during acute exacerbation of chronic obstructive pulmonary disease: a randomized controlled trial. *J Cardiopulm Rehabil Prev* 2012; 32(3):163-9. **90)** Greening NJ, Williams JEA, Hussain SF et al. An early rehabilitation intervention to enhance recovery during hospital admission for an exacerbation of chronic respiratory disease: randomised controlled trial 2014;349:g4315.

| Quality assessment                                               |                   |                      |                      |              |                      |                      | No of patients                      |                 | Effect              |                                                | Quality          | Importance |
|------------------------------------------------------------------|-------------------|----------------------|----------------------|--------------|----------------------|----------------------|-------------------------------------|-----------------|---------------------|------------------------------------------------|------------------|------------|
| No of studies                                                    | Design            | Risk of bias         | Inconsistency        | Indirectness | Imprecision          | Other considerations | Early rehabilitation versus control | Control         | Relative (95% CI)   | Absolute                                       |                  |            |
| <b>Hospital readmission</b>                                      |                   |                      |                      |              |                      |                      |                                     |                 |                     |                                                |                  |            |
| <b>All trials</b>                                                |                   |                      |                      |              |                      |                      |                                     |                 |                     |                                                |                  |            |
| 7 <sup>1</sup>                                                   | randomised trials | serious <sup>2</sup> | serious <sup>3</sup> | not serious  | serious <sup>4</sup> | none                 | 165/367 (45.0%)                     | 187/368 (50.8%) | RR 0.65 (0.42-1.00) | 178 fewer per 1000 (from 0 fewer to 295 fewer) | ⊕⊕⊕⊕<br>VERY LOW | CRITICAL   |
| <b>Pulmonary rehabilitation initiated during hospitalization</b> |                   |                      |                      |              |                      |                      |                                     |                 |                     |                                                |                  |            |
| 3 <sup>5</sup>                                                   | randomised trials | serious <sup>2</sup> | serious <sup>6</sup> | not serious  | serious <sup>4</sup> | none                 | 145/274                             | 143/274         | RR 0.88             | 63 fewer per 1000 (from 230 fewer to 193 more) | ---              | ---        |



| Pulmonary rehabilitation initiated following discharge from the hospital |                   |                      |                       |             |                      |      |     |     |   |                                      |             |           |
|--------------------------------------------------------------------------|-------------------|----------------------|-----------------------|-------------|----------------------|------|-----|-----|---|--------------------------------------|-------------|-----------|
| 5 <sup>12</sup>                                                          | randomised trials | serious <sup>2</sup> | serious <sup>13</sup> | not serious | serious <sup>4</sup> | none | 112 | 113 | - | MD 11.75 lower (19.76 to 3.75 lower) | ---         | ---       |
| 6 minute walking test (Better indicated by higher values)                |                   |                      |                       |             |                      |      |     |     |   |                                      |             |           |
| All trials                                                               |                   |                      |                       |             |                      |      |     |     |   |                                      |             |           |
| 8 <sup>14</sup>                                                          | randomised trials | serious <sup>2</sup> | serious <sup>15</sup> | not serious | not serious          | none | 239 | 183 | - | MD +88.89 m (+26.67 m to +151.11 m)  | ⊕⊕⊕⊕<br>LOW | IMPORTANT |
| Pulmonary rehabilitation initiated during hospitalization                |                   |                      |                       |             |                      |      |     |     |   |                                      |             |           |
| 5 <sup>16</sup>                                                          | randomised trials | serious <sup>2</sup> | serious <sup>15</sup> | not serious | not serious          | none | 156 | 111 | - | MD +107.92 m (+17.57 m to +198.27 m) | ---         | ---       |
| Pulmonary rehabilitation initiated following discharge from the hospital |                   |                      |                       |             |                      |      |     |     |   |                                      |             |           |
| 3 <sup>17</sup>                                                          | randomised trials | serious <sup>2</sup> | serious <sup>18</sup> | not serious | not serious          | none | 83  | 72  | - | MD +57.47 m (+20.04 m to +94.89 m)   | ---         | ---       |

<sup>1</sup> Behnke 2000; Eaton 2009; Greening 2014; Ko 2011; Man 2004; Murphy 2005; Seymour 2010; and Troosters 2010.

<sup>2</sup> None of the trials was blinded. Many of the trials had unclear concealment of allocation and either unclear or no adherence to intention-to-treat principle.

<sup>3</sup> Inconsistency:  $I^2=73%$ ,  $P(\text{het})=0.001$ .

<sup>4</sup> Wide confidence intervals: the ends of the confidence interval would lead to different clinical decisions.

<sup>5</sup> Behnke 2000; Eaton 2009; Greening 2014; and Troosters 2010.

<sup>6</sup> Inconsistency:  $I^2=71%$ ,  $P(\text{het})=0.03$ .

<sup>7</sup> Ko 2011; Man 2004; Murphy 2005; and Seymour 2010.

<sup>8</sup> Inconsistency:  $I^2=65%$ ,  $P(\text{het})=0.03$ .

<sup>9</sup> Behnke 2000; Greening 2014; Ko 2011; and, Man 2004. The five trials did not include Nava S, et al, which we excluded because it counted patients dying while they were still admitted to ICU. A sensitivity analysis demonstrated that exclusion of the trial had little effect on the results

<sup>10</sup> Behnke 2000 and Greening 2014.

<sup>11</sup> Ko 2011 and Man 2004.

<sup>12</sup> Deepak 2014; Ko 2011; Man 2004; Murphy 2005; and Seymour 2010.

<sup>13</sup> Inconsistency:  $I^2=70%$ ,  $P(\text{het})=0.009$ .

<sup>14</sup> Behnke 2000; Deepak 2014; Eaton 2009; Ghanem 2010; Kirsten 1998; Ko 2011; Nava 1998; and, Troosters 2010.

<sup>15</sup> Inconsistency:  $I^2=97%$ ,  $P(\text{het})=0.00001$ .

<sup>16</sup> Behnke 2000; Eaton 2009; Kirsten 1998; Nava 1998; and, Troosters 2010.

<sup>17</sup> Deepak 2014; Ghanem 2010; and, Ko 2011.

<sup>18</sup> Inconsistency:  $I^2=70%$ ,  $P(\text{het})=0.04$ .
